# Supplementary material for: Molecular structures, and optical and magnetic properties of free-base tetrapyrazinoporphyrazine in various reduction states
Source: Royal Society of Chemistry journal article supplement (doi:10.1039/c9nj04775a), 2019-01-01
Supplement: c9nj04775a1.pdf [file c9nj04775a1.pdf]

## New Journal of Chemistry

### Molecular structure, optical and magnetic properties of free-base tetrapyrazinoporphyrazine in various reduction states

Dmitri V. Konarev, Maxim A. Faraonov, Alexey V. Kuzmin, Nikita G. Osipov, Salavat S. Khasanov, Akihiro Otsuka, Hideki Yamochi, Hiroshi Kitagawa, Rimma N. Lyubovskaya

#### Supporting information

#### IR- spectra

**Table S1.** IR-spectra (cm<sup>-1</sup> in KBr) of starting compounds and salts **1-3**.

| Components            | cryptand[2.2.2] | Cp <sub>2</sub> Fe <sub>2</sub> (CO) <sub>4</sub> | C <sub>6</sub> H <sub>4</sub> Cl <sub>2</sub> | H <sub>2</sub> TPyzPz | <b>1</b> | <b>2</b> | <b>3</b> |
|-----------------------|-----------------|---------------------------------------------------|-----------------------------------------------|-----------------------|----------|----------|----------|
| H <sub>2</sub> TPyzPz |                 |                                                   |                                               | 444m                  | 444m     | 444m     | 444w     |
|                       |                 |                                                   |                                               | 571w                  | 571w*    | 571w*    | 562w*    |
|                       |                 |                                                   |                                               | 633s                  | 635m     | 634m     | 636m     |
|                       |                 |                                                   |                                               | 669w                  | -        | 668m     | -        |
|                       |                 |                                                   |                                               | 726s                  | 732m*    | 735m*    | 735m*    |
|                       |                 |                                                   |                                               | 752s                  | 752w*    | 758m*    | 750w*    |
|                       |                 |                                                   |                                               | 800s                  | 800m     | 790m     | 791m     |
|                       |                 |                                                   |                                               | 864m                  | 865w     | 859w     | -        |
|                       |                 |                                                   |                                               | 891s                  | 890w     | 882w     | 882w     |
|                       |                 |                                                   |                                               | -                     | 950m     | 950s     | 948m     |
|                       |                 |                                                   |                                               | 993m                  | -        | -        | -        |
|                       |                 |                                                   |                                               | 1040s                 | 1031m*   | 1028m*   | 1031m*   |
|                       |                 |                                                   |                                               | -                     | -        | 1052s    | 1052m    |
|                       |                 |                                                   |                                               | 1084w                 | -        | 1084s    | 1087s    |
|                       |                 |                                                   |                                               | 1121s                 | 1124s*   | -        | 1133s*   |
|                       |                 |                                                   |                                               | -                     | 1149m    | 1141s    | 1145s    |
|                       |                 |                                                   |                                               | 1157m                 | 1160s    | 1158s    | 1158s    |
|                       |                 |                                                   |                                               | 1198s                 | 1198s    | -        | -        |
|                       |                 |                                                   |                                               | 1264w                 | 1260s    | 1260s    | 1260s    |
|                       |                 |                                                   |                                               | 1294w                 | 1293m*   | 1300s*   | 1299s*   |
|                       |                 |                                                   |                                               | 1364s                 | 1358s*   | 1354s*   | 1355s*   |
|                       |                 |                                                   |                                               | -                     | -        | 1415s    | 1410s    |
|                       |                 |                                                   |                                               | -                     | 1474m    | 1476m    | 1478w    |
|                       |                 |                                                   |                                               | 1501m                 | 1507w    | 1498w*   | 1505w    |
|                       |                 |                                                   |                                               | 1560w                 | 1562w    | 1569m    | 1563w    |
|                       |                 |                                                   |                                               | -                     | -        | 1586s    | 1586s    |
|                       |                 |                                                   |                                               | -                     | -        | 1606m    | 1606m    |
|                       |                 |                                                   |                                               | 3051w                 | 3059w    | 3045w    | 3058w    |
|                       |                 |                                                   | 3286w                                         | 3302w                 | 3337w    | 3336w    |          |
| cryptand[2.2.2]       | 476w            |                                                   |                                               |                       | 468w     | -        | -        |
|                       | 528w            |                                                   |                                               |                       | 522w     | 525w     | 522w     |
|                       | 581w            |                                                   |                                               |                       | 571w*    | 571w*    | -        |
|                       | 735m            |                                                   |                                               |                       | 732m*    | 735m     | 734m*    |
|                       | 922m            |                                                   |                                               |                       | 932m     | 933m*    | 932w     |
|                       | 1038w           |                                                   |                                               |                       | 1031m*   | 1028m*   | 1031m*   |
|                       | 1071m           |                                                   |                                               |                       | -        | -        | -        |
|                       | 1100s           |                                                   |                                               |                       | 1101s    | 1103s    | 1103s    |

|                                                   |       |       |       |  |        |        |        |
|---------------------------------------------------|-------|-------|-------|--|--------|--------|--------|
|                                                   | 1127s |       |       |  | 1124s* | -      | 1133s* |
|                                                   | 1213w |       |       |  | -      | 1211m  | 1210m  |
|                                                   | 1295m |       |       |  | 1293m* | 1300s* | 1299s* |
|                                                   | 1329m |       |       |  | -      | 1332w  | 1333w  |
|                                                   | 1360s |       |       |  | 1358s* | 1354s* | 1355s* |
|                                                   | 1446m |       |       |  | 1445s  | 1443w  | 1443w  |
|                                                   | 1462m |       |       |  | 1453s* | 1458w* | 1456m* |
|                                                   | 2790w |       |       |  | -      | -      | -      |
|                                                   | 2877w |       |       |  | 2875m  | 2883m  | 2880m  |
|                                                   | 2943w |       |       |  | -      | -      | -      |
| C <sub>6</sub> H <sub>4</sub> Cl <sub>2</sub>     |       |       | 653m  |  | 658m   | 655w   | 649m*  |
|                                                   |       |       | 757m  |  | 752w*  | 758m*  | 750w*  |
|                                                   |       |       | 1035w |  | 1031m* | 1028m* | 1031m* |
|                                                   |       |       | 1456s |  | 1453s* | 1458w* | 1456m* |
| Cp <sub>2</sub> Fe <sub>2</sub> (CO) <sub>4</sub> |       | 542w  |       |  |        |        | 544w   |
|                                                   |       | 565w  |       |  |        |        | 562w*  |
|                                                   |       | 595w  |       |  |        |        | -      |
|                                                   |       | 648m  |       |  |        |        | 649m*  |
|                                                   |       | 830w  |       |  |        |        | 833w   |
|                                                   |       | 1016w |       |  |        |        | -      |
|                                                   |       | CO    |       |  |        |        | CO     |
|                                                   |       | 1756s |       |  |        |        | 1765s  |
|                                                   |       | 1771s |       |  |        |        | -      |
|                                                   |       | 1936s |       |  |        |        | 1930m  |
|                                                   |       | 1956s |       |  |        |        | 1975s  |
|                                                   |       | CH    |       |  |        |        | CH     |
|                                                   |       | 3113w |       |  |        |        | -      |

\* - bands are coincided

w – weak intensity, m –middle intensity, s – strong intensity

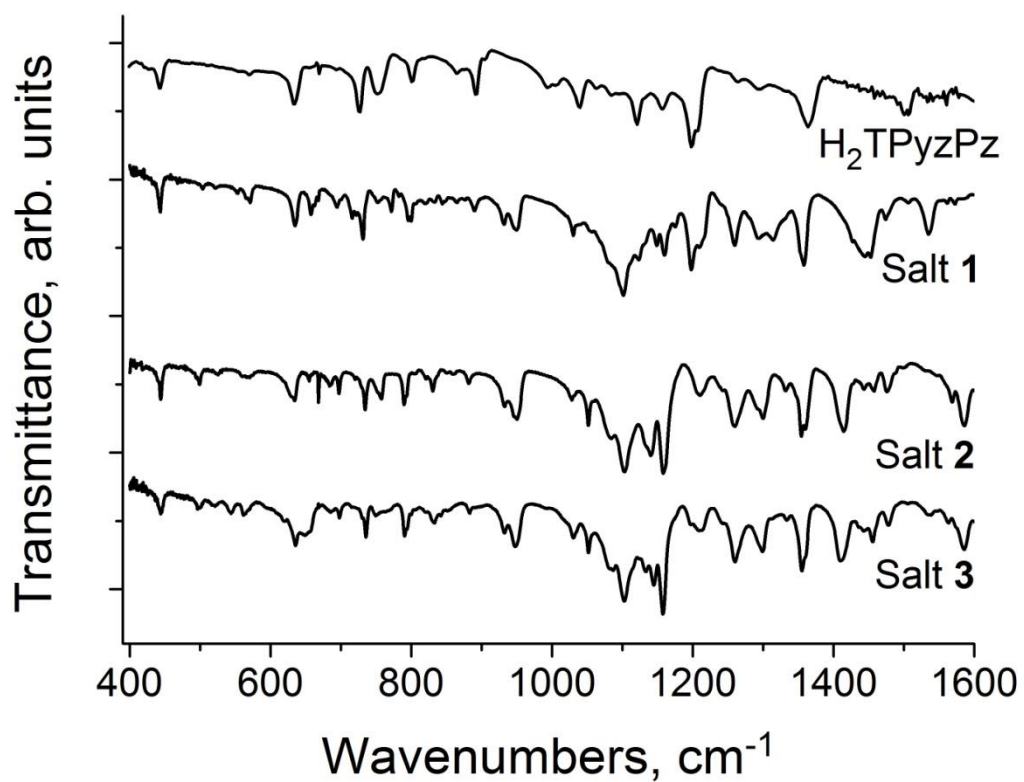

**Figure S1.** IR spectra of neutral H<sub>2</sub>TPyzPz and salts 1-3 in KBr pellets prepared in anaerobic condition.

**Table S2.** Geometric parameters for phthalocyanine and tetrapyrroline macrocycles in different compounds and according to DFT calculations.

| Compound                                                                                                       | Charge state of the macro cycle | Average length of the bonds, Å, and bond angles in °.             |                                                                     |                                                      |
|----------------------------------------------------------------------------------------------------------------|---------------------------------|-------------------------------------------------------------------|---------------------------------------------------------------------|------------------------------------------------------|
|                                                                                                                |                                 | C-N <sub>pyr</sub> , angle CN <sub>pyr</sub> C (in pyrrole ring*) | C-N <sub>pyr</sub> , angle CN <sub>pyr</sub> C (in pyrroline ring*) | C-N <sub>meso</sub> short/long, difference           |
| Pristine H <sub>2</sub> Pc [1]                                                                                 | 0                               | 1.373(4), 109.77°                                                 | 1.373(4), 108.03°                                                   | 1.327(2)                                             |
| (Bu <sub>4</sub> N <sup>+</sup> ) <sub>2</sub> (H <sub>2</sub> Pc <sup>•-</sup> )(Br <sup>-</sup> ) [2]        | -1                              | 1.381(9), 112.06°                                                 | 1.370(9), 106.58°                                                   | 1.303(8)/1.363(8), 0.060                             |
| (Pr <sub>4</sub> N <sup>+</sup> ) <sub>2</sub> (H <sub>2</sub> Pc <sup>•-</sup> )(Br <sup>-</sup> ) [2]        | -1                              | 1.389(3), 112.39°                                                 | 1.373(3), 106.47°                                                   | 1.309(3)/1.367(3), 0.058                             |
| Salt 1 for two of three independent macrocycles                                                                | -1                              | 1.369(3), 110.87°<br>1.367(3), 110.26°                            | 1.364(3), 108.53°<br>1.364(3), 108.35°                              | 1.324(3)/1.335(3), 0.011<br>1.325(3)/1.334(3), 0.009 |
| Salt 2                                                                                                         | -2                              | 1.395(4), 113.03°<br>1.395(4), 113.40°                            | 1.373(4), 107.67°<br>1.374(4), 107.22°                              | 1.291(4)/1.378(4), 0.087<br>1.290(4)/1.382(4), 0.092 |
| Salt 3                                                                                                         | -2                              | 1.398(2), 112.98°<br>1.390(3), 112.66°                            | 1.370(2), 107.60°<br>1.367(3), 108.17°                              | 1.289(2)/1.374(2), 0.085<br>1.297(3)/1.371(3), 0.074 |
| Salt 4 [3]                                                                                                     | -2                              | 1.384(2)                                                          |                                                                     | 1.284(2)/1.376(2), 0.092                             |
| Pristine H <sub>2</sub> TPyzPz (DFT) [3]                                                                       | 0                               | 1.386, 113.38°                                                    | 1.374, 107.82°                                                      | 1.318/1.336, 0.018                                   |
| H <sub>2</sub> TPyzPz <sup>•-</sup> (DFT) [3]                                                                  | -1                              | 1.388, 113.66°                                                    | 1.381, 108.17°                                                      | 1.325/1.338, 0.013                                   |
| H <sub>2</sub> TPyzPz <sup>2-</sup> (DFT) [3]                                                                  | -2                              | 1.403, 113.32°                                                    | 1.378, 108.86°                                                      | 1.303/1.367, 0.064                                   |
| *pyrrole ring contains nitrogen atoms with hydrogen<br>pyrroline ring contains nitrogen atoms without hydrogen |                                 |                                                                   |                                                                     |                                                      |

## EPR measurements

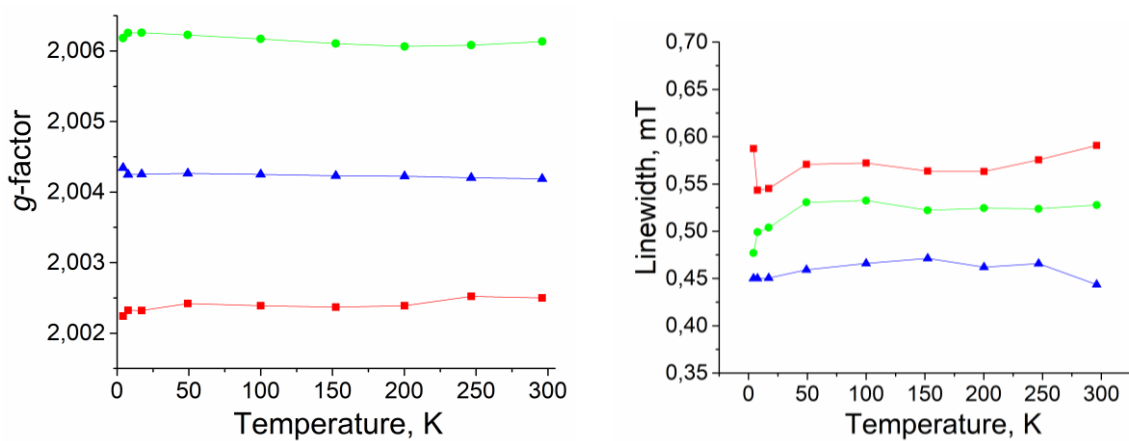

**Figure S2.** Temperature dependence of g-factor and linewidth of lines manifested in the EPR spectrum of salt **1**.

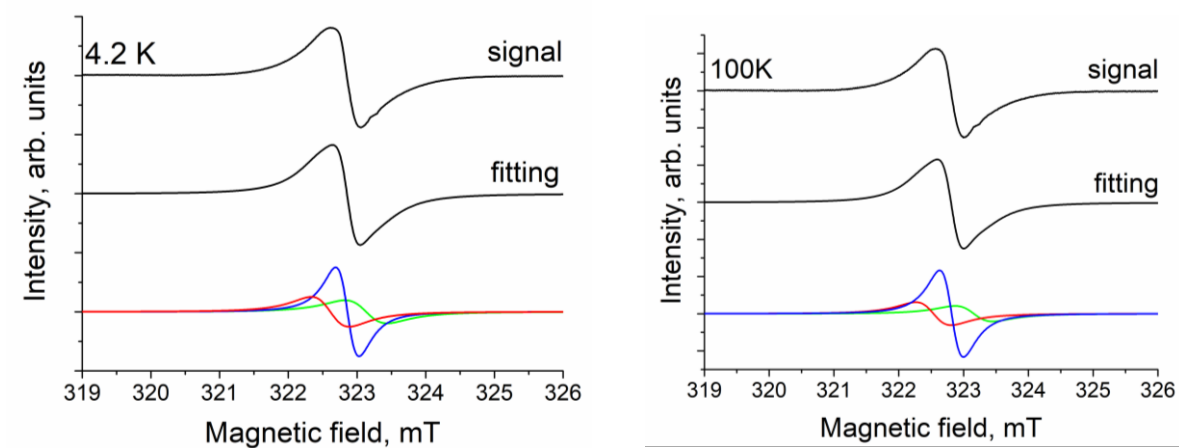

**Figure S3.** Examples of EPR spectra of polycrystalline **2** at 4.2 and 100 K.

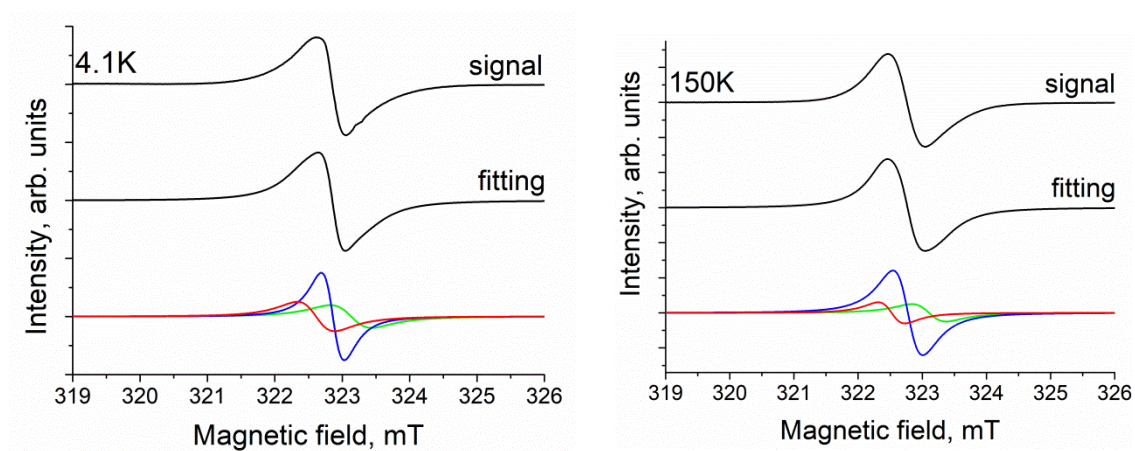

**Figure S4.** Examples of EPR spectra of polycrystalline **3** at 4.2 and 150 K.

## References

- 1 S. Matsumoto, K. Matsuhama and J. Mizuguchi, *Acta Crystallogr C Cryst Struct Commun*, 1999, **55**, 131–133. 10.1107/S0108270198011020
- 2 D. V. Konarev, A. V. Kuzmin, M. A. Faraonov, M. Ishikawa, S. S. Khasanov, Y. Nakano, A. Otsuka, H. Yamochi, G. Saito and R. N. Lyubovskaya, *Chem. Eur. J.*, 2015, **21**, 1014–1028. 10.1002/chem.201404925
- 3 D. V. Konarev, M. A. Faraonov, A. V. Kuzmin, A. M. Fatalov, N. G. Osipov, S. S. Khasanov, A. F. Shestakov and R. N. Lyubovskaya, *ChemistrySelect*, 2018, **3**, 4339–4343. 10.1002/slct.201800739
